# Supplementary material
Source: PubMed Central journal article supplement (PMC3171998)
Supplement: Supp_Data.pdf [file Supp_Data.pdf]

# Supplementary Material

## Survey Measures

### Presurvey Questions

- In an average day, how many hours are you online? \_\_\_\_\_hours  
 In an average day, how many hours do you watch television? \_\_\_\_\_hours  
 In an average day, how many hours do you play videogames? \_\_\_\_\_hours  
 In an average day, how many hours do you read printed material? \_\_\_\_\_hours  
 In an average day, how many hours do you listen to music? \_\_\_\_\_hours  
 How many televisions do you have where you live? \_\_\_\_\_  
 How many computers do you have in your primary residence? \_\_\_\_\_  
 How many television shows do you regularly watch? \_\_\_\_\_  
 Do you own or use a Digital Video Recorder? \_\_\_\_\_  
 How many websites do you generally visit daily? \_\_\_\_\_  
 Are you a member of Facebook or MySpace? \_\_\_\_\_  
 Your age: \_\_\_\_\_  
 Your gender: \_\_\_\_\_

### Postsurvey Questions

Please tell us to what degree you found the television:

|                    | Strongly disagree                   | Strongly agree |
|--------------------|-------------------------------------|----------------|
| Interesting        | 1--- 2 --- 3 --- 4 --- 5 --- 6 ---7 |                |
| Exciting           | 1--- 2 --- 3 --- 4 --- 5 --- 6 ---7 |                |
| Informative        | 1--- 2 --- 3 --- 4 --- 5 --- 6 ---7 |                |
| Educational        | 1--- 2 --- 3 --- 4 --- 5 --- 6 ---7 |                |
| Visually Appealing | 1--- 2 --- 3 --- 4 --- 5 --- 6 ---7 |                |

Please tell us to what degree you found the computer:

|                    | Strongly Disagree                   | Strongly Agree |
|--------------------|-------------------------------------|----------------|
| Interesting        | 1--- 2 --- 3 --- 4 --- 5 --- 6 ---7 |                |
| Exciting           | 1--- 2 --- 3 --- 4 --- 5 --- 6 ---7 |                |
| Informative        | 1--- 2 --- 3 --- 4 --- 5 --- 6 ---7 |                |
| Educational        | 1--- 2 --- 3 --- 4 --- 5 --- 6 ---7 |                |
| Visually Appealing | 1--- 2 --- 3 --- 4 --- 5 --- 6 ---7 |                |

How many times do you think you switched from television to computer or from computer to television over the course of the study? \_\_\_\_\_times

Please rate how strongly you agree with the following statements:

|                                                             | Strongly Disagree               | Strongly Agree |
|-------------------------------------------------------------|---------------------------------|----------------|
| I enjoy multitasking                                        | 1 -- 2 -- 3 -- 4 -- 5 -- 6 -- 7 |                |
| Multitasking makes you more productive                      | 1 -- 2 -- 3 -- 4 -- 5 -- 6 -- 7 |                |
| I am an effective multitasker                               | 1 -- 2 -- 3 -- 4 -- 5 -- 6 -- 7 |                |
| I can easily pay attention to more than one thing at a time | 1 -- 2 -- 3 -- 4 -- 5 -- 6 -- 7 |                |

Please rate your agreement with the following statements:

|                                                                       | Strongly Disagree               | Strongly Agree |
|-----------------------------------------------------------------------|---------------------------------|----------------|
| I would like to explore strange places                                | 1 -- 2 -- 3 -- 4 -- 5 -- 6 -- 7 |                |
| I like to do frightening things                                       | 1 -- 2 -- 3 -- 4 -- 5 -- 6 -- 7 |                |
| I like new and exciting experiences even if I have to break the rules | 1 -- 2 -- 3 -- 4 -- 5 -- 6 -- 7 |                |
| I prefer friends who are exciting and unpredictable                   | 1 -- 2 -- 3 -- 4 -- 5 -- 6 -- 7 |                |

Please rate your agreement with the following statements:

|                                                              | Strongly Disagree                     | Strongly Agree |
|--------------------------------------------------------------|---------------------------------------|----------------|
| I do not like to juggle several activities at the same time. | 1 --- 2 --- 3 --- 4 --- 5 --- 6 --- 7 |                |
| People should not try to do many things at once.             | 1 --- 2 --- 3 --- 4 --- 5 --- 6 --- 7 |                |
| I am comfortable doing several things at the same time.      | 1 --- 2 --- 3 --- 4 --- 5 --- 6 --- 7 |                |

When you are watching television in your everyday life, what percentage of time is spent also using a computer?  
\_\_\_\_\_ %

When you are using a computer in your everyday life, what percentage of time is spent also watching television?  
\_\_\_\_\_ %

If you had to estimate, what percentage of your media usage is spent consuming multiple media simultaneously?  
\_\_\_\_\_ %

How often do you simultaneously use the television and a computer?

Never Always  
1 --- 2 --- 3 --- 4 --- 5 --- 6 --- 7

How often do you simultaneously use the television and a computer?

Never Always  
1 --- 2 --- 3 --- 4 --- 5 --- 6 --- 7

How often do you listen to music when reading?

Never Always  
1 --- 2 --- 3 --- 4 --- 5 --- 6 --- 7

When you are watching television without using a computer, how often do you change channels or fast-forward through commercial breaks?

Almost never Almost always  
1 --- 2 --- 3 --- 4 --- 5 --- 6 --- 7

Does using a computer while watching TV reduce the number of channel changes you make?

Definitely no Definitely yes  
1 --- 2 --- 3 --- 4 --- 5 --- 6 --- 7
